# Supplementary material for: Postoperative Opioid Consumption After Discharge: An Update From the Michigan Surgical Quality Collaborative Registry
Source: PubMed Central journal article supplement (PMC11661719; doi:10.1097/as9.0000000000000517), 2024-11-07
Supplement: as9-5-e517-s001.pdf [file as9-5-e517-s001.pdf]

Supplementary Figure 1 Title  
 Patient-reported opioid consumption by procedure type

Supplementary Figure 1 Caption  
 Patient-reported opioid consumption and MSQC guidelines for all surveyed procedures.

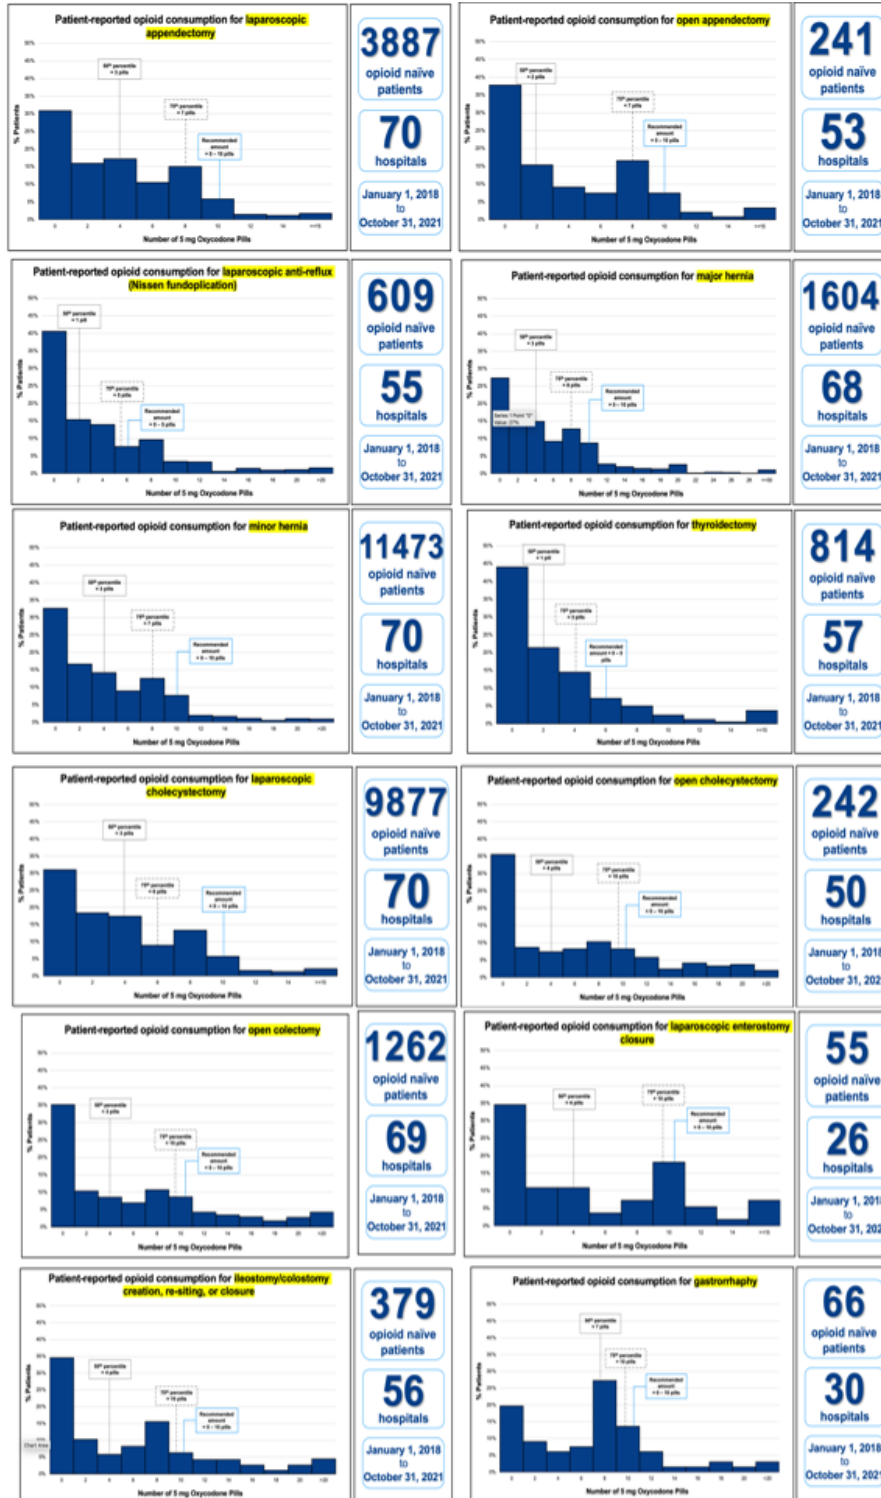

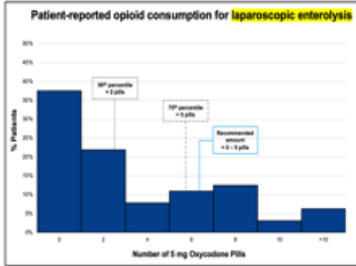

**64**  
opioid naive patients

**31**  
hospitals

January 1, 2018 to October 31, 2021

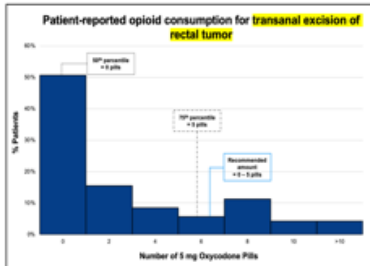

**71**  
opioid naive patients

**19**  
hospitals

January 1, 2018 to October 31, 2021

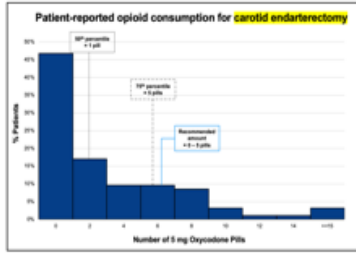

**94**  
Opioid naive patients

**19**  
hospitals

January 1, 2018 to October 31, 2021

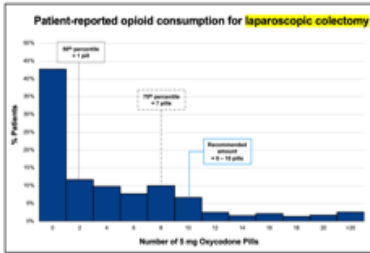

**1735**  
opioid naive patients

**65**  
hospitals

January 1, 2018 to October 31, 2021

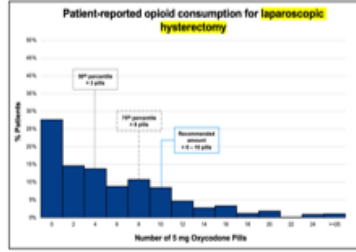

**3651**  
opioid naive patients

**56**  
hospitals

January 1, 2018 to October 31, 2021

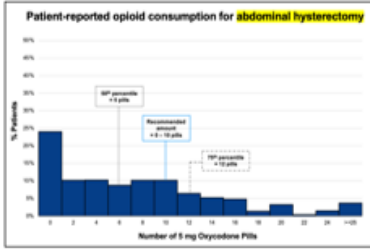

**1202**  
opioid naive patients

**59**  
hospitals

January 1, 2018 to October 31, 2021

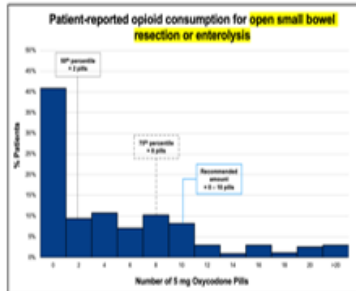

**438**  
opioid naive patients

**58**  
hospitals

January 1, 2018 to October 31, 2021

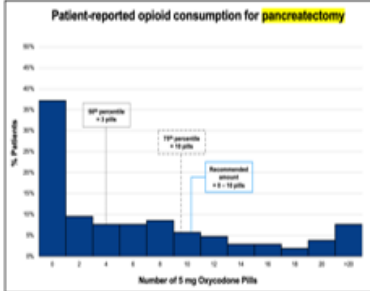

**105**  
opioid naive patients

**20**  
hospitals

January 1, 2018 to October 31, 2021

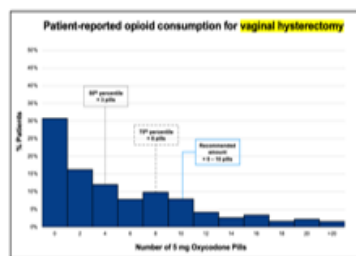

**1624**  
opioid naive patients

**60**  
hospitals

January 1, 2018 to October 31, 2021

Supplementary Table 1. Patient characteristics by procedure for primary cohort

|                             | Colectomy - Laparoscopic | Colectomy - Open | Ileostomy/Colostomy | Open Small Bowel Resection/Enterolysis | Anti-reflux (Nissen) - Laparoscopic | Appendectomy - Open | Cholecystectomy - Open |
|-----------------------------|--------------------------|------------------|---------------------|----------------------------------------|-------------------------------------|---------------------|------------------------|
|                             | N=1,735                  | N=1,262          | N=379               | N=438                                  | N=609                               | N=241               | N=242                  |
| <b>Age, mean (SD) years</b> |                          |                  |                     |                                        |                                     |                     |                        |
|                             | 62.23(12.56)             | 62.77 (13.15)    | 60.84 (13.14)       | 63.28 (14.86)                          | 61.19 (13.30)                       | 49.18 (18.10)       | 61.32 (15.75)          |
| <b>Sex</b>                  |                          |                  |                     |                                        |                                     |                     |                        |
| Male                        | 827 (47.7%)              | 573 (45.4%)      | 196 (51.7%)         | 188 (42.9%)                            | 160 (26.3%)                         | 124 (51.5%)         | 132 (54.5%)            |
| Female                      | 908 (52.3%)              | 689 (54.6%)      | 183 (48.3%)         | 250 (57.1%)                            | 449 (73.7%)                         | 117 (48.5%)         | 110 (45.5%)            |
| <b>Race/ethnicity</b>       |                          |                  |                     |                                        |                                     |                     |                        |
| White, non-Hispanic         | 1,441 (83.1%)            | 1,087 (86.1%)    | 317 (83.6%)         | 369 (84.2%)                            | 538 (88.3%)                         | 188 (78.0%)         | 184 (76.0%)            |
| Black, non-Hispanic         | 154 (8.9%)               | 99 (7.8%)        | 40 (10.6%)          | 40 (9.1%)                              | 25 (4.1%)                           | 21 (8.7%)           | 42 (17.4%)             |
| Hispanic                    | 32 (1.8%)                | 14 (1.1%)        | 6 (1.6%)            | 7 (1.6%)                               | 8 (1.3%)                            | 12 (5.0%)           | 3 (1.2%)               |
| Other                       | 10 (0.6%)                | 4 (0.3%)         | 1 (0.3%)            | 4 (0.9%)                               | 5 (0.8%)                            | 7 (2.9%)            | 4 (1.7%)               |
| Unknown                     | 98 (5.6%)                | 58 (4.6%)        | 15 (4.0%)           | 18 (4.1%)                              | 33 (5.4%)                           | 13 (5.4%)           | 9 (3.7%)               |
| <b>Insurance type</b>       |                          |                  |                     |                                        |                                     |                     |                        |
| Private                     | 799 (46.1%)              | 468 (37.1%)      | 134 (35.4%)         | 169 (38.6%)                            | 246 (40.4%)                         | 130 (53.9%)         | 77 (31.8%)             |
| Medicare                    | 737 (42.5%)              | 598 (47.4%)      | 162 (42.7%)         | 214 (48.9%)                            | 281 (46.1%)                         | 53 (22.0%)          | 113 (46.7%)            |
| Medicaid                    | 143 (8.2%)               | 126 (10.0%)      | 69 (18.2%)          | 35 (8.0%)                              | 64 (10.5%)                          | 39 (16.2%)          | 42 (17.4%)             |
| Medicare and Medicaid       | 28 (1.6%)                | 33 (2.6%)        | 10 (2.6%)           | 11 (2.5%)                              | 11 (1.8%)                           | 0 (0.0%)            | 6 (2.5%)               |
| Other/Uninsured             | 28 (1.6%)                | 37 (2.9%)        | 4 (1.1%)            | 9 (2.1%)                               | 7 (1.1%)                            | 19 (7.9%)           | 4 (1.7%)               |
| <b>Surgical priority</b>    |                          |                  |                     |                                        |                                     |                     |                        |
| Elective                    | 1,551 (89.4%)            | 628 (49.8%)      | 343 (90.5%)         | 75 (17.1%)                             | 591 (97.0%)                         | 19 (7.9%)           | 101 (41.7%)            |

|                 |             |             |           |             |           |             |             |
|-----------------|-------------|-------------|-----------|-------------|-----------|-------------|-------------|
| Emergent/urgent | 184 (10.6%) | 634 (50.2%) | 36 (9.5%) | 363 (82.9%) | 18 (3.0%) | 222 (92.1%) | 141 (58.3%) |
|-----------------|-------------|-------------|-----------|-------------|-----------|-------------|-------------|

|  | Major Hernia | Thyroidectomy | Hysterectomy - Abdominal | Hysterectomy - Vaginal | Carotid Endarterectomy | Pancreatic resection | Excision of rectal tumor, transanal approach | Gastrotomy, suture of perforated duodenal or gastric ulcer, wound, or injury | Laparoscopic enterolysis | Laparoscopic closure of enterostomy w/ resection and anastomosis |
|--|--------------|---------------|--------------------------|------------------------|------------------------|----------------------|----------------------------------------------|------------------------------------------------------------------------------|--------------------------|------------------------------------------------------------------|
|  | N=1,604      | N=814         | N=1,202                  | N=1,624                | N=94                   | N=105                | N=71                                         | N=66                                                                         | N=64                     | N=55                                                             |

#### Age, mean (SD) years

|  |               |               |               |               |              |               |               |               |               |               |
|--|---------------|---------------|---------------|---------------|--------------|---------------|---------------|---------------|---------------|---------------|
|  | 57.46 (14.54) | 52.41 (15.05) | 49.82 (10.89) | 51.41 (13.29) | 71.61 (8.18) | 63.97 (10.33) | 65.42 (11.68) | 56.50 (15.37) | 59.97 (13.77) | 56.85 (15.52) |
|--|---------------|---------------|---------------|---------------|--------------|---------------|---------------|---------------|---------------|---------------|

#### Sex

|        |             |             |                |                |            |            |            |            |            |            |
|--------|-------------|-------------|----------------|----------------|------------|------------|------------|------------|------------|------------|
| Male   | 753 (46.9%) | 163 (20.0%) | 0 (0.0%)       | 0 (0.0%)       | 56 (59.6%) | 55 (52.4%) | 29 (40.8%) | 26 (39.4%) | 23 (35.9%) | 26 (47.3%) |
| Female | 851 (53.1%) | 651 (80.0%) | 1,202 (100.0%) | 1,624 (100.0%) | 38 (40.4%) | 50 (47.6%) | 42 (59.2%) | 40 (60.6%) | 41 (64.1%) | 29 (52.7%) |

#### Race/ethnicity

|                     |               |             |             |               |            |            |            |            |            |            |
|---------------------|---------------|-------------|-------------|---------------|------------|------------|------------|------------|------------|------------|
| White, non-Hispanic | 1,301 (81.1%) | 607 (74.6%) | 755 (62.8%) | 1,347 (82.9%) | 75 (79.8%) | 84 (80.0%) | 63 (88.7%) | 54 (81.8%) | 51 (79.7%) | 48 (87.3%) |
| Black, non-Hispanic | 149 (9.3%)    | 101 (12.4%) | 295 (24.5%) | 113 (7.0%)    | 13 (13.8%) | 13 (12.4%) | 5 (7.0%)   | 7 (10.6%)  | 7 (10.9%)  | 4 (7.3%)   |
| Hispanic            | 41 (2.6%)     | 15 (1.8%)   | 25 (2.1%)   | 44 (2.7%)     | 0 (0.0%)   | 0 (0.0%)   | 0 (0.0%)   | 0 (0.0%)   | 2 (3.1%)   | 0 (0.0%)   |
| Other               | 19 (1.2%)     | 19 (2.3%)   | 23 (1.9%)   | 15 (0.9%)     | 0 (0.0%)   | 3 (2.9%)   | 0 (0.0%)   | 1 (1.5%)   | 0 (0.0%)   | 0 (0.0%)   |
| Unknown             | 94 (5.9%)     | 72 (8.8%)   | 104 (8.7%)  | 105 (6.5%)    | 6 (6.4%)   | 5 (4.8%)   | 3 (4.2%)   | 4 (6.1%)   | 4 (6.3%)   | 3 (5.5%)   |

#### Insurance type

|         |             |             |             |             |            |            |            |            |            |            |
|---------|-------------|-------------|-------------|-------------|------------|------------|------------|------------|------------|------------|
| Private | 763 (47.6%) | 452 (55.5%) | 777 (64.6%) | 969 (59.7%) | 12 (12.8%) | 49 (46.7%) | 31 (43.7%) | 16 (24.2%) | 27 (42.2%) | 22 (40.0%) |
|---------|-------------|-------------|-------------|-------------|------------|------------|------------|------------|------------|------------|

|                          |                  |                |                  |                  |               |                |               |             |               |             |
|--------------------------|------------------|----------------|------------------|------------------|---------------|----------------|---------------|-------------|---------------|-------------|
| Medicare                 | 548<br>(34.2%)   | 199<br>(24.4%) | 162<br>(13.5%)   | 339<br>(20.9%)   | 72<br>(76.6%) | 45<br>(42.9%)  | 38<br>(53.5%) | 23 (34.8%)  | 28<br>(43.8%) | 22 (40.0%)  |
| Medicaid                 | 229<br>(14.3%)   | 138<br>(17.0%) | 214<br>(17.8%)   | 275<br>(16.9%)   | 4 (4.3%)      | 10 (9.5%)      | 2 (2.8%)      | 23 (34.8%)  | 5 (7.8%)      | 8 (14.5%)   |
| Medicare and Medicaid    | 37<br>(2.3%)     | 13<br>(1.6%)   | 27<br>(2.2%)     | 17<br>(1.0%)     | 6 (6.4%)      | 1 (1.0%)       | 0 (0.0%)      | 1 (1.5%)    | 3 (4.7%)      | 2 (3.6%)    |
| Other/Uninsured          | 27<br>(1.7%)     | 12<br>(1.5%)   | 22<br>(1.8%)     | 24<br>(1.5%)     | 0 (0.0%)      | 0 (0.0%)       | 0 (0.0%)      | 3 (4.5%)    | 1 (1.6%)      | 1 (1.8%)    |
| <b>Surgical priority</b> |                  |                |                  |                  |               |                |               |             |               |             |
| Elective                 | 1,444<br>(90.0%) | 812<br>(99.8%) | 1,157<br>(96.3%) | 1,614<br>(99.4%) | 82<br>(87.2%) | 101<br>(96.2%) | 70<br>(98.6%) | 0 (0.0%)    | 15<br>(23.4%) | 55 (100.0%) |
| Emergency/urgent         | 160<br>(10.0%)   | 2<br>(0.2%)    | 45<br>(3.7%)     | 10<br>(0.6%)     | 12<br>(12.8%) | 4 (3.8%)       | 1 (1.4%)      | 66 (100.0%) | 49<br>(76.6%) | 0 (0.0%)    |

Supplementary Table 2. Secondary Cohort Characteristics

| Demographic Characteristics                         | 6/1/2019 - 10/31/2021 |
|-----------------------------------------------------|-----------------------|
|                                                     | N=28,721              |
| <b>Age, mean (SD) years</b>                         | 53.9 (16.40)          |
| <b>Sex</b>                                          |                       |
| Male                                                | 12,476 (43.4%)        |
| Female                                              | 16,245 (56.6%)        |
| <b>Race/ethnicity</b>                               |                       |
| White, non-Hispanic                                 | 23,054 (80.3%)        |
| Black, non-Hispanic                                 | 2,573 (9.0%)          |
| Hispanic                                            | 670 (2.3%)            |
| Other                                               | 327 (1.1%)            |
| Unknown                                             | 2,097 (7.3%)          |
| <b>Insurance type</b>                               |                       |
| Private                                             | 15,280 (53.2%)        |
| Medicare                                            | 8,105 (28.2%)         |
| Medicaid                                            | 4,184 (14.6%)         |
| Medicare and Medicaid                               | 420 (1.5%)            |
| Other/Uninsured                                     | 732 (2.5%)            |
| <b>Procedure type</b>                               |                       |
| Colectomy - Laparoscopic                            | 1,321 (4.6%)          |
| Colectomy - Open                                    | 911 (3.2%)            |
| Ileostomy/Colostomy Creation, Re-siting, or Closure | 294 (1.0%)            |
| Open Small Bowel Resection or Enterolysis           | 348 (1.2%)            |
| Anti-reflux (Nissen) - Laparoscopic                 | 522 (1.8%)            |
| Appendectomy - Laparoscopic                         | 2,930 (10.2%)         |

|                                                                                          |                |
|------------------------------------------------------------------------------------------|----------------|
| Appendectomy - Open                                                                      | 176 (0.6%)     |
| Cholecystectomy - Laparoscopic                                                           | 7,087 (24.7%)  |
| Cholecystectomy - Open                                                                   | 178 (0.6%)     |
| Minor Hernia                                                                             | 8,166 (28.4%)  |
| Major Hernia                                                                             | 1,140 (4.0%)   |
| Thyroidectomy                                                                            | 659 (2.3%)     |
| Hysterectomy - Abdominal                                                                 | 831 (2.9%)     |
| Hysterectomy - Laparoscopic                                                              | 2,643 (9.2%)   |
| Hysterectomy - Vaginal                                                                   | 1,148 (4.0%)   |
| Carotid Endarterectomy                                                                   | 72 (0.3%)      |
| Excision of rectal tumor, transanal approach                                             | 55 (0.2%)      |
| Pancreatectomy                                                                           | 89 (0.3%)      |
| Gastrorrhaphy, suture of perforated duodenal or gastric ulcer, wound, or injury          | 53 (0.2%)      |
| Laparoscopic enterolysis                                                                 | 49 (0.2%)      |
| Laparoscopic closure of enterostomy (large of small bowel) w/ resection and anastomosis) | 49 (0.2%)      |
| <b>Surgical priority</b>                                                                 |                |
| Elective                                                                                 | 21,775 (75.8%) |
| Emergent/urgent                                                                          | 6,946 (24.2%)  |

Supplementary Table 3. Opioid consumption<sup>A</sup> by procedure for secondary cohort

| Surgical procedures                                | Secondary Cohort (6/1/2019 - 10/31/2021) |      |     |        |                 |                 |      |                               |
|----------------------------------------------------|------------------------------------------|------|-----|--------|-----------------|-----------------|------|-------------------------------|
|                                                    | Number of cases                          | Mean | SD  | Median | 25th percentile | 75th percentile | IQR  | % cases with zero consumption |
| <b>Current Procedures</b>                          |                                          |      |     |        |                 |                 |      |                               |
| Colectomy - Laparoscopic                           | 1321                                     | 4.1  | 6.0 | 1.3    | 0.0             | 6.7             | 6.7  | 43.8                          |
| Colectomy - Open                                   | 911                                      | 5.6  | 7.5 | 2.7    | 0.0             | 9.0             | 9.0  | 37.2                          |
| Ileostomy/Colostomy Creation, Resiting, or Closure | 294                                      | 6.0  | 8.0 | 4.0    | 0.0             | 8.0             | 8.0  | 34.7                          |
| Open Small Bowel Resection or Enterolysis          | 348                                      | 4.6  | 6.4 | 2.0    | 0.0             | 6.7             | 6.7  | 41.4                          |
| Anti-reflux (Nissen) - Laparoscopic                | 522                                      | 3.8  | 5.8 | 1.3    | 0.0             | 5.3             | 5.3  | 37.9                          |
| Appendectomy - Laparoscopic                        | 2930                                     | 3.4  | 3.9 | 2.7    | 0.0             | 6.0             | 6.0  | 32.0                          |
| Appendectomy - Open                                | 176                                      | 3.5  | 4.5 | 2.0    | 0.0             | 6.7             | 6.7  | 39.8                          |
| Cholecystectomy - Laparoscopic                     | 7087                                     | 3.3  | 4.0 | 2.0    | 0.0             | 5.3             | 5.3  | 32.2                          |
| Cholecystectomy - Open                             | 178                                      | 5.7  | 7.0 | 3.3    | 0.0             | 10.0            | 10.0 | 38.2                          |
| Minor Hernia                                       | 8166                                     | 3.6  | 4.5 | 2.0    | 0.0             | 6.0             | 6.0  | 34.7                          |
| Major Hernia                                       | 1140                                     | 4.9  | 6.0 | 3.3    | 0.0             | 6.7             | 6.7  | 27.1                          |
| Thyroidectomy                                      | 659                                      | 2.6  | 4.9 | 1.0    | 0.0             | 3.3             | 3.3  | 44.9                          |
| Hysterectomy - Abdominal                           | 831                                      | 6.9  | 8.0 | 5.3    | 0.0             | 10.0            | 10.0 | 26.0                          |
| Hysterectomy - Laparoscopic                        | 2643                                     | 5.2  | 6.2 | 3.3    | 0.0             | 8.0             | 8.0  | 28.6                          |
| Hysterectomy - Vaginal                             | 1148                                     | 4.6  | 5.5 | 2.7    | 0.0             | 8.0             | 8.0  | 33.0                          |



|                                                                                          |    |     |      |     |     |      |      |      |
|------------------------------------------------------------------------------------------|----|-----|------|-----|-----|------|------|------|
| Carotid Endarterectomy                                                                   | 72 | 2.7 | 4.8  | 0.9 | 0.0 | 4.0  | 4.0  | 47.2 |
| <b>New Procedures</b>                                                                    |    |     |      |     |     |      |      |      |
| Pancreatectomy                                                                           | 89 | 8.6 | 17.7 | 3.0 | 0.0 | 10.0 | 10.0 | 37.1 |
| Excision of rectal tumor, transanal approach                                             | 55 | 3.0 | 4.8  | 0.0 | 0.0 | 6.0  | 6.0  | 54.5 |
| Gastrorrhaphy, suture of perforated duodenal or gastric ulcer, wound, or injury          | 53 | 6.3 | 6.4  | 6.7 | 1.3 | 9.3  | 8.0  | 22.6 |
| Laparoscopic enterolysis                                                                 | 49 | 3.0 | 3.6  | 2.0 | 0.0 | 5.0  | 5.0  | 36.7 |
| Laparoscopic closure of enterostomy (large of small bowel) w/ resection and anastomosis) | 49 | 4.9 | 5.3  | 4.0 | 0.0 | 10.0 | 10.0 | 38.8 |

A. Consumption reported in 5mg oxycodone equivalents. Some procedures have no reported current guidelines since prior prescription data was not available.

Supplementary Table 4. Kolmogorov-Smirnov analysis for opioid consumption by surgery type

| Group           | Comparison            | Secondary Cohort (6/1/2019 - 10/31/2021) |         |
|-----------------|-----------------------|------------------------------------------|---------|
|                 |                       | Kolmogorov-Smirnov Test Statistic        | P value |
| Appendectomy    | Laparoscopic vs. open | 0.095                                    | 0.100   |
| Cholecystectomy | Laparoscopic vs. open | 0.212                                    | <0.001  |
| Colectomy       | Laparoscopic vs. open | 0.111                                    | <0.001  |
| Hernia          | Major vs. minor       | 0.095                                    | <0.001  |

Supplementary Table 5. Patient characteristics by procedure for secondary cohort

|                      | Total          | Colectomy - Laparoscopic | Colectomy - Open | Ileostomy/Colostomy Creation, Re-siting, or Closure | Open Small Bowel Resection or Enterolysis | Anti-reflux (Nissen) - Laparoscopic | Appendectomy - Laparoscopic | Appendectomy - Open | Cholecystectomy - Laparoscopic | Cholecystectomy - Open | Minor Hernia  |
|----------------------|----------------|--------------------------|------------------|-----------------------------------------------------|-------------------------------------------|-------------------------------------|-----------------------------|---------------------|--------------------------------|------------------------|---------------|
|                      | N=28,721       | N=1,321                  | N=911            | N=294                                               | N=348                                     | N=522                               | N=2,930                     | N=176               | N=7,087                        | N=178                  | N=8,166       |
| Age, mean (SD) years |                |                          |                  |                                                     |                                           |                                     |                             |                     |                                |                        |               |
|                      | 53.94 (16.40)  | 62.23 (12.57)            | 62.70 (13.42)    | 60.90 (13.31)                                       | 62.50 (14.76)                             | 61.12 (13.32)                       | 43.57 (17.34)               | 48.91 (17.49)       | 50.80 (17.40)                  | 61.71 (16.29)          | 58.36 (15.40) |
| Sex                  |                |                          |                  |                                                     |                                           |                                     |                             |                     |                                |                        |               |
| Male                 | 12,476 (43.4%) | 611 (46.3%)              | 410 (45.0%)      | 146 (49.7%)                                         | 146 (42.0%)                               | 138 (26.4%)                         | 1,327 (45.3%)               | 96 (54.5%)          | 2,078 (29.3%)                  | 96 (53.9%)             | 6,595 (80.8%) |
| Female               | 16,245 (56.6%) | 710 (53.7%)              | 501 (55.0%)      | 148 (50.3%)                                         | 202 (58.0%)                               | 384 (73.6%)                         | 1,603 (54.7%)               | 80 (45.5%)          | 5,009 (70.7%)                  | 82 (46.1%)             | 1,571 (19.2%) |
| Race/ethnicity       |                |                          |                  |                                                     |                                           |                                     |                             |                     |                                |                        |               |
| White, non-Hispanic  | 23,054 (80.3%) | 1,095 (82.9%)            | 780 (85.6%)      | 245 (83.3%)                                         | 288 (82.8%)                               | 458 (87.7%)                         | 2,409 (82.2%)               | 136 (77.3%)         | 5,742 (81.0%)                  | 126 (70.8%)            | 6,648 (81.4%) |
| Black, non-Hispanic  | 2,573 (9.0%)   | 118 (8.9%)               | 71 (7.8%)        | 31 (10.5%)                                          | 35 (10.1%)                                | 23 (4.4%)                           | 176 (6.0%)                  | 15 (8.5%)           | 581 (8.2%)                     | 36 (20.2%)             | 649 (7.9%)    |
| Hispanic             | 670 (2.3%)     | 20 (1.5%)                | 12 (1.3%)        | 5 (1.7%)                                            | 6 (1.7%)                                  | 7 (1.3%)                            | 116 (4.0%)                  | 7 (4.0%)            | 224 (3.2%)                     | 3 (1.7%)               | 123 (1.5%)    |
| Other                | 327 (1.1%)     | 8 (0.6%)                 | 3 (0.3%)         | 1 (0.3%)                                            | 4 (1.1%)                                  | 4 (0.8%)                            | 41 (1.4%)                   | 6 (3.4%)            | 92 (1.3%)                      | 4 (2.2%)               | 80 (1.0%)     |
| Unknown              | 2,097 (7.3%)   | 80 (6.1%)                | 45 (4.9%)        | 12 (4.1%)                                           | 15 (4.3%)                                 | 30 (5.7%)                           | 188 (6.4%)                  | 12 (6.8%)           | 448 (6.3%)                     | 9 (5.1%)               | 666 (8.2%)    |
| Insurance type       |                |                          |                  |                                                     |                                           |                                     |                             |                     |                                |                        |               |
| Private              | 15,280 (53.2%) | 613 (46.4%)              | 341 (37.4%)      | 100 (34.0%)                                         | 136 (39.1%)                               | 211 (40.4%)                         | 1,882 (64.2%)               | 93 (52.8%)          | 3,781 (53.4%)                  | 54 (30.3%)             | 4,046 (49.5%) |
| Medicare             | 8,105 (28.2%)  | 560 (42.4%)              | 431 (47.3%)      | 130 (44.2%)                                         | 166 (47.7%)                               | 238 (45.6%)                         | 390 (13.3%)                 | 39 (22.2%)          | 1,744 (24.6%)                  | 89 (50.0%)             | 2,834 (34.7%) |

|                          |                   |                  |                |                |                |                |                  |                |                  |                |                  |
|--------------------------|-------------------|------------------|----------------|----------------|----------------|----------------|------------------|----------------|------------------|----------------|------------------|
| Medicaid                 | 4,184<br>(14.6%)  | 106<br>(8.0%)    | 92<br>(10.1%)  | 56 (19.0%)     | 30<br>(8.6%)   | 56<br>(10.7%)  | 466<br>(15.9%)   | 32<br>(18.2%)  | 1,272<br>(17.9%) | 30<br>(16.9%)  | 998<br>(12.2%)   |
| Medicare and Medicaid    | 420<br>(1.5%)     | 22<br>(1.7%)     | 23<br>(2.5%)   | 5 (1.7%)       | 7 (2.0%)       | 10<br>(1.9%)   | 22<br>(0.8%)     | 0 (0.0%)       | 104<br>(1.5%)    | 3<br>(1.7%)    | 102<br>(1.2%)    |
| Other/Uninsured          | 732<br>(2.5%)     | 20<br>(1.5%)     | 24<br>(2.6%)   | 3 (1.0%)       | 9 (2.6%)       | 7 (1.3%)       | 170<br>(5.8%)    | 12<br>(6.8%)   | 186<br>(2.6%)    | 2<br>(1.1%)    | 186<br>(2.3%)    |
| <b>Surgical priority</b> |                   |                  |                |                |                |                |                  |                |                  |                |                  |
| Elective                 | 21,775<br>(75.8%) | 1,174<br>(88.9%) | 439<br>(48.2%) | 262<br>(89.1%) | 60<br>(17.2%)  | 506<br>(96.9%) | 221<br>(7.5%)    | 15<br>(8.5%)   | 4,643<br>(65.5%) | 76<br>(42.7%)  | 7,853<br>(96.2%) |
| Emergent/urgent          | 6,946<br>(24.2%)  | 147<br>(11.1%)   | 472<br>(51.8%) | 32 (10.9%)     | 288<br>(82.8%) | 16<br>(3.1%)   | 2,709<br>(92.5%) | 161<br>(91.5%) | 2,444<br>(34.5%) | 102<br>(57.3%) | 313<br>(3.8%)    |

|                       | Major Hernia  | Thyroidectomy | Hysterectomy - Abdominal | Hysterectomy - Laparoscopic | Hysterectomy - Vaginal | Carotid Endarterectomy | Pancreatic resection | Excision of rectal tumor, transanal approach | Gastrostomy, suture of perforated duodenal or gastric ulcer, wound, or injury | Laparoscopic enterolysis | Laparoscopic closure of enterostomy (large of small bowel) w/ resection and anastomosis |
|-----------------------|---------------|---------------|--------------------------|-----------------------------|------------------------|------------------------|----------------------|----------------------------------------------|-------------------------------------------------------------------------------|--------------------------|-----------------------------------------------------------------------------------------|
|                       | N=1,140       | N=659         | N=831                    | N=2,643                     | N=1,148                | N=72                   | N=89                 | N=55                                         | N=53                                                                          | N=49                     | N=49                                                                                    |
| Age, mean (SD) years  | 57.66 (14.54) | 52.36 (15.03) | 49.81 (10.72)            | 49.42 (12.27)               | 51.53 (13.40)          | 70.86 (7.97)           | 64.84 (9.66)         | 66.98 (11.59)                                | 56.23 (15.74)                                                                 | 60.16 (14.52)            | 57.27 (15.83)                                                                           |
| <b>Sex</b>            |               |               |                          |                             |                        |                        |                      |                                              |                                                                               |                          |                                                                                         |
| Male                  | 522 (45.8%)   | 133 (20.2%)   | 0 (0.0%)                 | 0 (0.0%)                    | 0 (0.0%)               | 42 (58.3%)             | 48 (53.9%)           | 23 (41.8%)                                   | 24 (45.3%)                                                                    | 18 (36.7%)               | 23 (46.9%)                                                                              |
| Female                | 618 (54.2%)   | 526 (79.8%)   | 831 (100.0%)             | 2,643 (100.0%)              | 1,148 (100.0%)         | 30 (41.7%)             | 41 (46.1%)           | 32 (58.2%)                                   | 29 (54.7%)                                                                    | 31 (63.3%)               | 26 (53.1%)                                                                              |
| <b>Race/ethnicity</b> |               |               |                          |                             |                        |                        |                      |                                              |                                                                               |                          |                                                                                         |
| White, non-Hispanic   | 913 (80.1%)   | 475 (72.1%)   | 519 (62.5%)              | 1,977 (74.8%)               | 944 (82.2%)            | 57 (79.2%)             | 72 (80.9%)           | 48 (87.3%)                                   | 41 (77.4%)                                                                    | 38 (77.6%)               | 43 (87.8%)                                                                              |

|                       |                  |                |                |                  |                  |               |               |               |                |               |                |
|-----------------------|------------------|----------------|----------------|------------------|------------------|---------------|---------------|---------------|----------------|---------------|----------------|
| Black, non-Hispanic   | 111<br>(9.7%)    | 94<br>(14.3%)  | 198<br>(23.8%) | 308<br>(11.7%)   | 87<br>(7.6%)     | 9<br>(12.5%)  | 10<br>(11.2%) | 5<br>(9.1%)   | 7<br>(13.2%)   | 5<br>(10.2%)  | 4<br>(8.2%)    |
| Hispanic              | 33<br>(2.9%)     | 14<br>(2.1%)   | 14<br>(1.7%)   | 53<br>(2.0%)     | 31<br>(2.7%)     | 0<br>(0.0%)   | 0<br>(0.0%)   | 0<br>(0.0%)   | 0<br>(0.0%)    | 2<br>(4.1%)   | 0<br>(0.0%)    |
| Other                 | 12<br>(1.1%)     | 14<br>(2.1%)   | 17<br>(2.0%)   | 27<br>(1.0%)     | 11<br>(1.0%)     | 0<br>(0.0%)   | 2<br>(2.2%)   | 0<br>(0.0%)   | 1<br>(1.9%)    | 0<br>(0.0%)   | 0<br>(0.0%)    |
| Unknown               | 71<br>(6.2%)     | 62<br>(9.4%)   | 83<br>(10.0%)  | 278<br>(10.5%)   | 75<br>(6.5%)     | 6<br>(8.3%)   | 5<br>(5.6%)   | 2<br>(3.6%)   | 4<br>(7.5%)    | 4<br>(8.2%)   | 2<br>(4.1%)    |
| Insurance type        |                  |                |                |                  |                  |               |               |               |                |               |                |
| Private               | 534<br>(46.8%)   | 361<br>(54.8%) | 538<br>(64.7%) | 1,780<br>(67.3%) | 683<br>(59.5%)   | 10<br>(13.9%) | 43<br>(48.3%) | 22<br>(40.0%) | 14<br>(26.4%)  | 19<br>(38.8%) | 19<br>(38.8%)  |
| Medicare              | 398<br>(34.9%)   | 169<br>(25.6%) | 104<br>(12.5%) | 383<br>(14.5%)   | 240<br>(20.9%)   | 54<br>(75.0%) | 40<br>(44.9%) | 32<br>(58.2%) | 19<br>(35.8%)  | 24<br>(49.0%) | 21<br>(42.9%)  |
| Medicaid              | 161<br>(14.1%)   | 112<br>(17.0%) | 149<br>(17.9%) | 393<br>(14.9%)   | 196<br>(17.1%)   | 3<br>(4.2%)   | 5<br>(5.6%)   | 1<br>(1.8%)   | 16<br>(30.2%)  | 4<br>(8.2%)   | 6<br>(12.2%)   |
| Medicare and Medicaid | 28<br>(2.5%)     | 10<br>(1.5%)   | 23<br>(2.8%)   | 38<br>(1.4%)     | 12<br>(1.0%)     | 5<br>(6.9%)   | 1<br>(1.1%)   | 0<br>(0.0%)   | 1<br>(1.9%)    | 2<br>(4.1%)   | 2<br>(4.1%)    |
| Other/Uninsured       | 19<br>(1.7%)     | 7<br>(1.1%)    | 17<br>(2.0%)   | 49<br>(1.9%)     | 17<br>(1.5%)     | 0<br>(0.0%)   | 0<br>(0.0%)   | 0<br>(0.0%)   | 3<br>(5.7%)    | 0<br>(0.0%)   | 1<br>(2.0%)    |
| Surgical priority     |                  |                |                |                  |                  |               |               |               |                |               |                |
| Elective              | 1,027<br>(90.1%) | 658<br>(99.8%) | 802<br>(96.5%) | 2,635<br>(99.7%) | 1,138<br>(99.1%) | 63<br>(87.5%) | 88<br>(98.9%) | 54<br>(98.2%) | 0<br>(0.0%)    | 12<br>(24.5%) | 49<br>(100.0%) |
| Emergency/urgent      | 113<br>(9.9%)    | 1<br>(0.2%)    | 29<br>(3.5%)   | 8<br>(0.3%)      | 10<br>(0.9%)     | 9<br>(12.5%)  | 1<br>(1.1%)   | 1<br>(1.8%)   | 53<br>(100.0%) | 37<br>(75.5%) | 0<br>(0.0%)    |
